# Supplementary material for: Accurate and robust segmentation of neuroanatomy in T1‐weighted MRI by combining spatial priors with deep convolutional neural networks
Source: PubMed Central journal article supplement (PMC7267949; doi:10.1002/hbm.24803), 2019-10-21
Supplement: HBM-41-309-s001.pdf [file HBM-41-309-s001.pdf]

# Accurate and robust segmentation of neuroanatomy in T1-weighted MRI by combining spatial priors with deep convolutional neural networks

Philip Novosad<sup>a,b,\*</sup>, Vladimir Fonov<sup>a,b</sup>, D. Louis Collins<sup>a,b</sup>, and Alzheimer's Disease Neuroimaging Initiative<sup>1</sup>

\*Corresponding author at: McConnell Brain Imaging Centre, Montreal Neurological Institute, McGill University, Montreal, Canada. E-mail address: philip.novosad@mail.mcgill.ca

<sup>a</sup>McConnell Brain Imaging Centre, Montreal Neurological Institute, McGill University, Montreal, Canada

<sup>b</sup>Department of Biomedical Engineering, McGill University, Montreal, Canada

<sup>1</sup>Data used in preparation of this article were obtained from the Alzheimer's Disease Neuroimaging Initiative (ADNI) database ([adni.loni.usc.edu](http://adni.loni.usc.edu)). As such, the investigators within the ADNI contributed to the design and implementation of ADNI and/or provided data but did not participate in analysis or writing of this report. A complete listing of ADNI investigators can be found at [http://adni.loni.usc.edu/wp-content/uploads/how\\_to\\_apply/ADNI\\_Acknowledgement\\_List.pdf](http://adni.loni.usc.edu/wp-content/uploads/how_to_apply/ADNI_Acknowledgement_List.pdf).

## 1 Supplementary material

Tables 9 and 10 summarize the reliability and accuracy of the compared segmentation methods in the OASIS scan-rescan dataset using the original manual reference segmentations provided by Neuromorphometrics (i.e. without median filtering). All networks were re-trained on the original labels, and all performance metrics in Table 10 were re-calculated using the original unfiltered labels as the references. Training on the original labels had little effect on the reproducibility of the CNN-based methods. However, using the original manual labels resulted in a drop in the reliability estimates of manual labelling, from a mean Dice of 86.9% over all structures (using median filtering) to a mean Dice of 83.9% ( $p = 4 \times 10^{-41}$ ). The accuracy of the various automated methods also dropped when using the original manual segmentations as the reference. For example, the mean Dice coefficient of the top performing method CNN-SP-D + DA dropped from 86.6% over all structures to 85.1% ( $p = 1 \times 10^{-27}$ ).

|               | CNN-B       | CNN-SP      | CNN-SP-D           | CNN-SP-D + DA      | FIRST              | Manual      |
|---------------|-------------|-------------|--------------------|--------------------|--------------------|-------------|
| L Caudate     | 92.4 (1.4)  | 92.5 (1.6)  | 92.8 (1.4)         | <b>92.9 (1.4)</b>  | 90.8 (5.0)         | 85.1 (2.2)  |
|               | 0.19 (0.03) | 0.19 (0.04) | 0.17 (0.03)        | <b>0.17 (0.03)</b> | 0.24 (0.14)        | 0.35 (0.06) |
| R Caudate     | 92.0 (1.0)  | 92.1 (0.9)  | 92.2 (0.9)         | <b>92.4 (0.9)</b>  | 91.9 (0.9)         | 85.2 (2.3)  |
|               | 0.19 (0.02) | 0.19 (0.03) | 0.18 (0.02)        | <b>0.18 (0.02)</b> | 0.20 (0.02)        | 0.34 (0.06) |
| L Putamen     | 92.9 (1.5)  | 93.7 (1.3)  | 93.9 (1.2)         | 94.0 (1.2)         | <b>94.5 (0.6)</b>  | 86.1 (1.9)  |
|               | 0.21 (0.04) | 0.19 (0.05) | 0.19 (0.04)        | <b>0.18 (0.04)</b> | 0.20 (0.02)        | 0.39 (0.07) |
| R Putamen     | 93.2 (1.2)  | 93.7 (1.1)  | 93.9 (0.9)         | 94.0 (0.8)         | <b>94.6 (0.5)</b>  | 86.4 (1.7)  |
|               | 0.21 (0.04) | 0.20 (0.04) | 0.19 (0.03)        | <b>0.19 (0.02)</b> | 0.20 (0.02)        | 0.39 (0.06) |
| L Thalamus    | 94.7 (1.2)  | 95.0 (0.8)  | 95.4 (0.8)         | 95.5 (0.7)         | <b>96.1 (0.7)</b>  | 89.6 (0.6)  |
|               | 0.24 (0.06) | 0.22 (0.04) | 0.21 (0.03)        | 0.20 (0.03)        | <b>0.20 (0.03)</b> | 0.44 (0.04) |
| R Thalamus    | 95.0 (0.8)  | 95.3 (0.8)  | 95.5 (0.8)         | 95.5 (0.7)         | <b>95.9 (0.6)</b>  | 89.7 (0.9)  |
|               | 0.23 (0.04) | 0.22 (0.04) | <b>0.21 (0.04)</b> | 0.21 (0.03)        | 0.21 (0.03)        | 0.44 (0.05) |
| L Hippocampus | 89.5 (1.6)  | 90.5 (1.6)  | 91.2 (1.1)         | <b>91.6 (1.0)</b>  | 90.8 (1.3)         | 83.3 (0.9)  |
|               | 0.24 (0.04) | 0.24 (0.07) | 0.21 (0.03)        | <b>0.20 (0.03)</b> | 0.24 (0.05)        | 0.38 (0.03) |
| R Hippocampus | 88.9 (1.8)  | 90.2 (1.5)  | 90.8 (1.4)         | <b>91.2 (1.2)</b>  | 91.1 (0.8)         | 82.5 (1.0)  |
|               | 0.24 (0.04) | 0.23 (0.04) | 0.22 (0.03)        | <b>0.21 (0.02)</b> | 0.22 (0.02)        | 0.41 (0.06) |
| L Pallidum    | 90.5 (3.1)  | 91.9 (1.8)  | 92.0 (1.9)         | <b>92.5 (1.6)</b>  | 92.3 (1.9)         | 81.9 (3.9)  |
|               | 0.24 (0.07) | 0.21 (0.04) | 0.21 (0.05)        | <b>0.20 (0.05)</b> | 0.22 (0.05)        | 0.47 (0.11) |
| R Pallidum    | 90.1 (2.6)  | 91.9 (1.4)  | <b>92.2 (1.1)</b>  | 92.1 (1.2)         | 91.2 (2.9)         | 82.1 (3.3)  |
|               | 0.25 (0.06) | 0.21 (0.04) | <b>0.20 (0.03)</b> | 0.21 (0.03)        | 0.26 (0.10)        | 0.46 (0.09) |
| L Amygdala    | 84.1 (4.1)  | 85.9 (4.1)  | 87.7 (2.3)         | <b>88.7 (1.5)</b>  | 84.8 (7.2)         | 77.0 (4.0)  |
|               | 0.31 (0.07) | 0.30 (0.08) | 0.27 (0.04)        | <b>0.25 (0.04)</b> | 0.34 (0.15)        | 0.51 (0.14) |
| R Amygdala    | 79.9 (18.7) | 86.3 (4.5)  | 87.9 (2.7)         | <b>88.6 (2.7)</b>  | 85.8 (5.2)         | 77.5 (2.1)  |
|               | 2.35 (8.89) | 0.30 (0.11) | 0.26 (0.06)        | <b>0.25 (0.06)</b> | 0.32 (0.14)        | 0.48 (0.07) |
| All           | 90.3 (7.1)  | 91.6 (3.6)  | 92.1 (2.8)         | <b>92.4 (2.5)</b>  | 91.7 (4.7)         | 83.9 (4.5)  |
|               | 0.41 (2.64) | 0.22 (0.07) | 0.21 (0.05)        | <b>0.20 (0.04)</b> | 0.24 (0.09)        | 0.42 (0.09) |

Table 1: Reliability in the OASIS scan-rescan dataset using the raw unfiltered manual labelings. Each table cell reports the mean Dice coefficient (standard deviation) as a percentage on top and the mean MHD (standard deviation), in millimeters, on bottom. The top performing method is emboldened in each row.

|               | CNN-B       | CNN-SP      | CNN-SP-D    | CNN-SP-D + DA      | FIRST       |
|---------------|-------------|-------------|-------------|--------------------|-------------|
| L Caudate     | 84.3 (3.3)  | 84.3 (5.0)  | 85.5 (3.1)  | <b>85.7 (2.3)</b>  | 72.2 (6.3)  |
|               | 0.45 (0.16) | 0.48 (0.37) | 0.38 (0.10) | <b>0.37 (0.07)</b> | 0.82 (0.20) |
| R Caudate     | 84.9 (3.4)  | 85.8 (2.7)  | 86.0 (2.5)  | <b>86.2 (2.4)</b>  | 69.0 (7.2)  |
|               | 0.42 (0.17) | 0.37 (0.11) | 0.36 (0.08) | <b>0.35 (0.06)</b> | 0.88 (0.22) |
| L Putamen     | 86.4 (2.1)  | 87.3 (2.5)  | 87.6 (2.3)  | <b>87.8 (2.6)</b>  | 84.0 (2.1)  |
|               | 0.44 (0.08) | 0.41 (0.09) | 0.39 (0.09) | <b>0.39 (0.09)</b> | 0.58 (0.08) |
| R Putamen     | 87.3 (1.9)  | 87.7 (1.7)  | 87.7 (2.0)  | <b>88.0 (1.6)</b>  | 83.7 (2.5)  |
|               | 0.42 (0.07) | 0.39 (0.06) | 0.41 (0.08) | <b>0.39 (0.06)</b> | 0.62 (0.09) |
| L Thalamus    | 88.7 (1.4)  | 88.7 (2.8)  | 88.7 (3.8)  | <b>89.5 (1.6)</b>  | 85.6 (2.1)  |
|               | 0.54 (0.08) | 0.60 (0.35) | 0.57 (0.23) | <b>0.53 (0.09)</b> | 0.84 (0.11) |
| R Thalamus    | 89.9 (0.9)  | 89.9 (1.2)  | 90.2 (1.5)  | <b>90.7 (0.9)</b>  | 87.1 (1.3)  |
|               | 0.49 (0.05) | 0.51 (0.08) | 0.50 (0.09) | <b>0.48 (0.05)</b> | 0.76 (0.07) |
| L Hippocampus | 81.2 (3.8)  | 82.1 (4.7)  | 83.9 (1.9)  | <b>84.7 (1.6)</b>  | 79.6 (1.6)  |
|               | 0.50 (0.14) | 0.60 (0.59) | 0.43 (0.08) | <b>0.42 (0.14)</b> | 0.55 (0.07) |
| R Hippocampus | 80.4 (4.2)  | 82.3 (3.8)  | 83.0 (2.1)  | <b>84.5 (1.3)</b>  | 79.5 (1.9)  |
|               | 0.54 (0.21) | 0.56 (0.49) | 0.46 (0.09) | <b>0.40 (0.06)</b> | 0.55 (0.06) |
| L Pallidum    | 80.2 (4.2)  | 82.4 (3.8)  | 82.6 (3.6)  | <b>83.6 (4.7)</b>  | 76.1 (6.3)  |
|               | 0.55 (0.12) | 0.51 (0.13) | 0.50 (0.11) | <b>0.47 (0.13)</b> | 0.74 (0.26) |
| R Pallidum    | 81.4 (3.8)  | 83.3 (3.4)  | 82.9 (4.6)  | <b>83.9 (3.1)</b>  | 75.2 (6.2)  |
|               | 0.51 (0.10) | 0.46 (0.10) | 0.48 (0.14) | <b>0.44 (0.09)</b> | 0.77 (0.22) |
| L Amygdala    | 69.6 (16.9) | 75.3 (4.1)  | 76.1 (3.9)  | <b>77.8 (3.7)</b>  | 69.2 (9.0)  |
|               | 2.50 (8.31) | 0.58 (0.11) | 0.59 (0.15) | <b>0.54 (0.11)</b> | 0.86 (0.38) |
| R Amygdala    | 74.5 (4.6)  | 75.8 (5.1)  | 77.5 (2.6)  | <b>79.0 (3.3)</b>  | 71.0 (4.7)  |
|               | 0.57 (0.16) | 0.58 (0.17) | 0.52 (0.07) | <b>0.50 (0.11)</b> | 0.74 (0.13) |
| All           | 82.4 (8.1)  | 83.8 (5.7)  | 84.3 (5.1)  | <b>85.1 (4.5)</b>  | 77.7 (8.0)  |
|               | 0.66 (2.47) | 0.50 (0.29) | 0.46 (0.14) | <b>0.44 (0.11)</b> | 0.73 (0.22) |

Table 2: Accuracy in the OASIS scan-rescan dataset using the raw unfiltered manual labelings. Each table cell reports the mean Dice coefficient (standard deviation) as a percentage on top and the mean MHD (standard deviation), in millimeters, on bottom. The top performing method is emboldened in each row.
